# Supplementary material for: Impounding Reservoirs, Benefits and Risks: A Review of Environmental and Technical Aspects of Construction and Operation
Source: MDPI journal article supplement (doi:10.3390/su152216020), 2023-11-16
Supplement: s1 [file s1]

Archive with 4 entries (4 files):
- Supplementary S1.pdf
- Supplementary S2.pdf
- Supplementary S3.pdf
- Supplementary S4.pdf
